# Supplementary material for: Determination of the concentration range for 267 proteins from 21 lots of commercial human plasma using highly multiplexed multiple reaction monitoring mass spectrometry
Source: Royal Society of Chemistry journal article supplement (doi:10.1039/c9an01893j), 2020-01-01
Supplement: c9an01893j1.pdf [file c9an01893j1.pdf]

## Supplementary Information

### **Determination of the concentration range for 267 proteins from 21 lots of commercial human plasma using highly multiplexed multiple reaction monitoring mass spectrometry**

Claudia Gaither<sup>1‡</sup>, Robert Popp<sup>1‡</sup>, Yassene Mohammed<sup>2,3</sup>, and Christoph H. Borchers<sup>1,2,4-7\*</sup>

1. MRM Proteomics Inc. 141 Avenue du Président-Kennedy, SB-5100, C.P. #26, Montreal, QC H2X 3X8, Canada

2. University of Victoria - Genome British Columbia Proteomics Centre, University of Victoria, Victoria, British Columbia V8Z 7X8, Canada

3. Center for Proteomics and Metabolomics, Leiden University Medical Center, Albinusdreef 2, Leiden, 2333 ZA, The Netherlands

4. Department of Biochemistry and Microbiology, University of Victoria, Victoria, British Columbia, V8P 5C2, Canada

5. Segal Cancer Proteomics Centre, Lady Davis Institute, Jewish General Hospital, McGill University, Montreal, Quebec, H3T 1E2, Canada

6. Gerald Bronfman Department of Oncology, Jewish General Hospital, McGill University, Montreal, Quebec, H3T 1E2, Canada

7. Department of Data Intensive Science and Engineering, Skolkovo Institute of Science and Technology, Skolkovo Innovation Center, Nobel St., Moscow 143026, Russia

‡These authors contributed equally

\*Corresponding author:

Christoph H. Borchers

christoph.borchers@mcgill.ca

Supplementary Table 1. MRM peptides used for the quantitation of 267 human plasma proteins. Based on current scientific knowledge and the UniProt database, all peptides are unique to their respective protein unless specified otherwise and indicated by the presence of more than one UniProt ID in the table below.

| UniProt ID                                                                            | Protein                                                           | Peptide              |
|---------------------------------------------------------------------------------------|-------------------------------------------------------------------|----------------------|
| P04196                                                                                | Histidine-rich glycoprotein                                       | ADLFYDVEALDLESPK     |
| P07204                                                                                | Thrombomodulin                                                    | SSVAADVISLLLNGDGGVGR |
| P11597                                                                                | Cholesteryl ester transfer protein                                | GVSLFDIINPEIITR      |
| P09104                                                                                | Gamma-enolase                                                     | YITGDQLGALYQDFVR     |
| P01138                                                                                | Beta-nerve growth factor                                          | TTATDIK              |
| P35542                                                                                | Serum amyloid A-4 protein                                         | GNYDAAQR             |
| Q8NDB2                                                                                | B-cell scaffold protein with ankyrin repeats                      | LTIVHHPGGK           |
| P10809                                                                                | 60 kDa heat shock protein mitochondrial                           | GIIDPTK              |
| P08253                                                                                | 72 kDa type IV collagenase                                        | IDAVYEAPQEEK         |
| P11021                                                                                | 78 kDa glucose-regulated protein                                  | ITPSYVAFTPEGER       |
| O95450                                                                                | A disintegrin and metalloproteinase with thrombospondin motifs 2  | IILLSY GK            |
| P59510                                                                                | A disintegrin and metalloproteinase with thrombospondin motifs 20 | IPAGATNVDIR          |
| Q9P2N4                                                                                | A disintegrin and metalloproteinase with thrombospondin motifs 9  | LYNPDVR              |
| P62736 P68032 <br>P60709 P63267 <br>Q562R1 Q9BYX7 <br>Q6S8J3 A5A3E0<br> P68133 P02760 | Actin, aortic smooth muscle                                       | SYELPDGQVITIGNER     |
| Q8IZF2                                                                                | Adhesion G protein-coupled receptor F5                            | DVIVHPLPLK           |
| Q9HDC9                                                                                | Adipocyte plasma membrane-associated protein                      | LLEYDTVTR            |
| Q15848                                                                                | Adiponectin                                                       | IFYNQNHVDGSGTK       |
| P35318                                                                                | ADM                                                               | LDVASEFR             |
| P43652                                                                                | Afamin                                                            | DADPDTFFAK           |
| P02763                                                                                | Alpha-1-acid glycoprotein 1                                       | NWGLSVYADKPETTK      |
| P01011                                                                                | Alpha-1-antichymotrypsin                                          | EIGELYLPK            |
| P01009                                                                                | Alpha-1-antitrypsin                                               | SVLGQLGITK           |
| P04217                                                                                | Alpha-1B-glycoprotein_VAR_018369                                  | LETPDFQLFK           |
| P08697                                                                                | Alpha-2-antiplasmin                                               | LGNQEPGGQTALK        |
| P02765                                                                                | Alpha-2-HS-glycoprotein                                           | FSVVYAK              |
| P01023                                                                                | Alpha-2-macroglobulin                                             | AIGYLNTGYQR          |
| P03950                                                                                | Angiogenin                                                        | DINTFIHGK            |
| Q9Y5C1                                                                                | Angiopoietin-related protein 3                                    | DLVFSTWDHK           |
| P01019                                                                                | Angiotensinogen                                                   | ALQDQLVLA AK         |
| P01008                                                                                | Antithrombin-III                                                  | DDLIVS DAFHK         |
| P02647                                                                                | Apolipoprotein A-I                                                | ATEHLSTLSEK          |
| P02652                                                                                | Apolipoprotein A-II                                               | SPELQAEAK            |
| P06727                                                                                | Apolipoprotein A-IV                                               | LGEVNTYAGDLQK        |
| P04114                                                                                | Apolipoprotein B-100                                              | FPEVDVLTK            |
| P02654                                                                                | Apolipoprotein C-I                                                | EFWFSETFQK           |

|        |                                                          |                  |
|--------|----------------------------------------------------------|------------------|
| P02655 | Apolipoprotein C-II                                      | TYLPAVDEK        |
| P02656 | Apolipoprotein C-III                                     | GWVTDGFSSLK      |
| P55056 | Apolipoprotein C-IV                                      | ELLETVVNR        |
| P05090 | Apolipoprotein D                                         | NILTSNNIDVK      |
| P02649 | Apolipoprotein E                                         | LGPLVEQGR        |
| Q13790 | Apolipoprotein F                                         | SGVQQLIQYYQDQK   |
| O14791 | Apolipoprotein L1                                        | VAQELEEK         |
| O95445 | Apolipoprotein M                                         | AFLLTPR          |
| P08519 | Apolipoprotein(a)                                        | GYSTTVTGR        |
| P11511 | Aromatase                                                | NMLEMIFTPR       |
| P16066 | Atrial natriuretic peptide receptor 1                    | ITDYGLESFR       |
| O75882 | Attractin                                                | SVNNVVVR         |
| Q8WXX7 | Autism susceptibility gene 2 protein                     | ALSLASSGSDK      |
| P02749 | Beta-2-glycoprotein 1                                    | ATVVYQGER        |
| P61769 | Beta-2-microglobulin                                     | VNHVTLSPK        |
| Q96KN2 | Beta-Ala-His dipeptidase                                 | ALEQDLPVNIK      |
| P43251 | Biotinidase                                              | SHLIIAQVAK       |
| P04003 | C4b-binding protein alpha chain                          | EDVYVVGTVLR      |
| P55290 | Cadherin-13                                              | INENTGSVSVTR     |
| P33151 | Cadherin-5                                               | ELDSTGTPTGK      |
| P06881 | Calcitonin gene-related peptide 1                        | NNFVPTNVGSK      |
| P01258 | Calcitonin                                               | FHTFPQTAIGVGAPGK |
| P51911 | Calponin-1                                               | VNVGVK           |
| P00915 | Carbonic anhydrase 1                                     | VLDALQAIK        |
| Q96IY4 | Carboxypeptidase B2                                      | IAWHVIR          |
| P15169 | Carboxypeptidase N catalytic chain                       | SIPQVSPVR        |
| P22792 | Carboxypeptidase N subunit 2                             | AGGSWDLAVQER     |
| Q9NQ79 | Cartilage acidic protein 1                               | GVASLFAGR        |
| P49913 | Cathelicidin antimicrobial peptide                       | AIDGINQR         |
| P11717 | Cation-independent mannose-6-phosphate receptor          | GHQAFDVGQPR      |
| P29965 | CD40 ligand                                              | SQFEGFVK         |
| P16070 | CD44 antigen                                             | YGFIEGHVVIPR     |
| O43866 | CD5 antigen-like                                         | LVGGLHR          |
| B7Z2X4 | cDNA FLJ53327, highly similar to Gelsolin (NOT REVIEWED) | EGGQTAPASTR      |
| P00450 | Ceruloplasmin                                            | IYHSHIDAPK       |
| P06276 | Cholinesterase                                           | YLTLNTESTR       |
| P10645 | Chromogranin-A                                           | ELQDLALQGAK      |
| O00501 | Claudin-5                                                | PDLSPVK          |
| P10909 | Clusterin                                                | ELDESLQVAER      |
| P00740 | Coagulation factor IX                                    | SALVLQYLR        |
| P12259 | Coagulation factor V                                     | AEVDDVIQVR       |
| P08709 | Coagulation factor VII                                   | VSQYIEWLQK       |
| P00451 | Coagulation factor VIII                                  | LHPHYSIR         |

|               |                                          |                  |
|---------------|------------------------------------------|------------------|
| P00742        | Coagulation factor X                     | MLEVPYVDR        |
| P03951        | Coagulation factor XI                    | TSEGLPSTR        |
| P00748        | Coagulation factor XII                   | EQPPSLTR         |
| P00488        | Coagulation factor XIII A chain          | GTYIPVPIVSELQSGK |
| P05160        | Coagulation factor XIII B chain          | IQTHSTTYR        |
| P02452        | Collagen alpha-1(I) chain                | GVVGLPGQR        |
| P02461        | Collagen alpha-1(III) chain              | GGAGPPGPEGGK     |
| P39060        | Collagen alpha-1(XVIII) chain            | AVGLAGTFR        |
| P08123        | Collagen alpha-2(I) chain                | GVVGPQGAR        |
| P02745        | Complement C1q subcomponent subunit A    | PAFSAIR          |
| P02746        | Complement C1q subcomponent subunit B    | IAFSATR          |
| P02747        | Complement C1q subcomponent subunit C    | FQSVFTVTR        |
| P00736        | Complement C1r subcomponent              | GLTLHLK          |
| Q9NZP8        | Complement C1r subcomponent-like protein | VVVHPDYR         |
| P09871        | Complement C1s subcomponent              | TNFDNDIALVR      |
| P06681        | Complement C2                            | HAFILQDTK        |
| P01024        | Complement C3                            | TGLQEVEVK        |
| P01031        | Complement C5                            | VFQFLEK          |
| P13671        | Complement component C6                  | DLHLSDVFLK       |
| P10643        | Complement component C7                  | AASGTQNNVLR      |
| P07357        | Complement component C8 alpha chain      | MESLGITSR        |
| P07358        | Complement component C8 beta chain       | SDLEVAHYK        |
| P02748        | Complement component C9                  | LSPIYNLVPVK      |
| P00751        | Complement factor B                      | EELPAQDIK        |
| P00746        | Complement factor D                      | THHDGAITER       |
| P05156        | Complement factor I                      | VFSLQWGEVK       |
| P0C0L4 P0C0L5 | Complement_C4                            | VLSLAQEQVGGSPK   |
| P08185        | Corticosteroid-binding globulin          | WSAGLTSSQVDLYIPK |
| P02741        | C-reactive protein                       | AFVFPK           |
| P12277        | Creatine kinase B-type                   | DLFDPIEDR        |
| P06732        | Creatine kinase M-type                   | FEEILTR          |
| P01034        | Cystatin-C                               | ALDFAVGEYNK      |
| P15924        | Desmoplakin                              | AELIVQPELK       |
| O94907 Q9UBU2 | Dickkopf-related protein 1 and 2         | GSHGLEIFQR       |
| Q01459        | Di-N-acetylchitobiase                    | ATYIQNYR         |
| P15502        | Elastin                                  | LPGGYGLPYTTGK    |
| Q9Y5X9        | Endothelial lipase                       | LVSALHTR         |
| Q9UNN8        | Endothelial protein C receptor           | TLAFPLTIR        |
| P00533        | Epidermal growth factor receptor         | IPLNLQIIR        |
| P16581        | E-selectin                               | YTHLVAIQNK       |
| Q16610        | Extracellular matrix protein 1           | NVALVSGDTENAK    |
| P05413        | Fatty acid-binding protein heart         | SLGVGFATR        |
| P02794        | Ferritin heavy chain                     | NVNQSLLELHK      |

|               |                                                                        |                     |
|---------------|------------------------------------------------------------------------|---------------------|
| P02792        | Ferritin light chain                                                   | LGGPEAGLGEYLFER     |
| Q9UGM5        | Fetuin-B                                                               | LVVLPFPK            |
| P02671        | Fibrinogen alpha chain                                                 | VQHIQLLQK           |
| P02675        | Fibrinogen beta chain                                                  | HQLYIDETVNSNIPTNLR  |
| P02679        | Fibrinogen gamma chain                                                 | YEASILTHDSSIR       |
| P02751        | Fibronectin                                                            | HTSVQTTSSGSGPFTDVR  |
| P23142        | Fibulin-1                                                              | TGYYFDGISR          |
| Q15485        | Ficolin-2                                                              | GTHGSFANGINWK       |
| O75636        | Ficolin-3                                                              | YAVSEAAAHK          |
| Q12841        | Follistatin-related protein 1                                          | YVQELQK             |
| P05062        | Fructose-bisphosphate aldolase B                                       | ALQASALAAWGGK       |
| P17931        | Galectin-3                                                             | IALDFQR             |
| Q08380        | Galectin-3-binding protein                                             | SDLAVPSELALLK       |
| P06396        | Gelsolin                                                               | AGALNSNDAFVLK       |
| P14136        | Glial fibrillary acidic protein                                        | LADVYQAEER          |
| Q12879        | Glutamate receptor ionotropic NMDA 2A                                  | FSYIPEAK            |
| Q13224        | Glutamate receptor ionotropic NMDA 2B                                  | EPGGPSFTIGK         |
| P22352        | Glutathione peroxidase 3                                               | QEPGENSEILPTLK      |
| P09211        | Glutathione S-transferase P                                            | TLGLYGK             |
| P00738        | Haptoglobin                                                            | DIAPTLTLYVGK        |
| P04792        | Heat shock protein beta-1                                              | LFDQAFGLPR          |
| P69905        | Hemoglobin subunit alpha                                               | VGAHAGEYGAELER      |
| P02790        | Hemopexin                                                              | NFPSPVDAAFR         |
| P05546        | Heparin cofactor 2                                                     | TLEAQLTPR           |
| P26927        | Hepatocyte growth factor-like protein                                  | SPLNDFQVLR          |
| Q86YZ3        | Hornerin                                                               | GSGSGQSPSSGQHGTGFR  |
| Q14520        | Hyaluronan-binding protein 2                                           | VVLGDQDLK           |
| P01857        | Ig gamma-1 chain C region                                              | GPSVFPLAPSSK        |
| P01871        | Ig mu chain C region                                                   | GFPSVLR             |
| P04220 P01871 | Ig mu heavy chain disease protein and Ig mu chain C                    | VSVFVPPR            |
| Q9Y6R7        | IgGFc-binding protein                                                  | GATTSPGVYELSSR      |
| P06312        | Immunoglobulin kappa variable 4-1                                      | NYLAWYQQKPGQPPK     |
| P05019        | Insulin-like growth factor I                                           | GFYFNKPTGYGSSSR     |
| P08833        | Insulin-like growth factor-binding protein 1                           | ALPGEQQPLHALTR      |
| P18065        | Insulin-like growth factor-binding protein 2                           | LIQGAPTIR           |
| P17936        | Insulin-like growth factor-binding protein 3                           | FLNVLSR             |
| P35858        | Insulin-like growth factor-binding protein complex acid labile subunit | LAELPADALGPLQR      |
| P19827        | Inter-alpha-trypsin inhibitor heavy chain H1                           | GSLVQASEANLQAAQDFVR |
| P19823        | Inter-alpha-trypsin inhibitor heavy chain H2                           | SLAPTAAAK           |
| Q14624        | Inter-alpha-trypsin inhibitor heavy chain H4                           | SPEQQETVLDGNLIIR    |
| P05362        | Intercellular adhesion molecule 1                                      | LLGIETPLPK          |
| P22301        | Interleukin-10                                                         | AHVNSLGENLK         |
| P05231        | Interleukin-6                                                          | FESSEEQAR           |

|        |                                                      |                     |
|--------|------------------------------------------------------|---------------------|
| P03956 | Interstitial collagenase                             | AFQLWSNVTPLTFTK     |
| P29622 | Kallistatin                                          | VGSALFLSHNLK        |
| P13645 | Keratin type I cytoskeletal 10                       | SLLEGEGSSGGGGR      |
| P35527 | Keratin type I cytoskeletal 9                        | TLLDIDNTR           |
| P35908 | Keratin-type II cytoskeletal 2 epidermal             | YEELQVTVGR          |
| P01042 | Kininogen-1                                          | DIPTNSPELEETLTHTITK |
| P02788 | Lactotransferrin                                     | YLG PQYVAGITNLK     |
| P02750 | Leucine-rich alpha-2-glycoprotein                    | DLLLQPDLR           |
| P18428 | Lipopolysaccharide-binding protein                   | ITLPDFTGDLR         |
| P14151 | L-selectin                                           | AEIEYLEK            |
| P51884 | Lumican                                              | SLEDLQLTHNK         |
| P61626 | Lysozyme C                                           | AWVAWR              |
| P48740 | Mannan-binding lectin serine protease 1              | TGVITSPDFPNPYPK     |
| O00187 | Mannan-binding lectin serine protease 2A             | WPEPVFGR            |
| P11226 | Mannose-binding protein C                            | WLTFSLGK            |
| P08493 | Matrix Gla protein                                   | NANTFISPQQR         |
| P14780 | Matrix metalloproteinase-9                           | AVIDDAFAR           |
| P08582 | Melanotransferrin                                    | YYDYSGAFR           |
| P01033 | Metalloproteinase inhibitor 1                        | GFQALGDAADIR        |
| P16035 | Metalloproteinase inhibitor 2                        | EYLIAGK             |
| Q99727 | Metalloproteinase inhibitor 4                        | VVPASADPADTEK       |
| P10636 | Microtubule-associated protein tau                   | EADLPEPSEK          |
| Q8WXI7 | Mucin-16                                             | ELGPYTLDR           |
| P02686 | Myelin basic protein                                 | GVDAQGTL SK         |
| P24158 | Myeloblastin                                         | LVNVVLGAHNVR        |
| P05164 | Myeloperoxidase                                      | VFFASWR             |
| O94760 | N(G),N(G)-dimethylarginine dimethylaminohydrolase 1  | TPEEYPESAK          |
| Q96PD5 | N-acetylmuramoyl-L-alanine amidase                   | AGLLRPDYALLGHR      |
| P16860 | Natriuretic peptides B                               | EVATEGIR            |
| O60462 | Neuropilin-2                                         | ALQVVR              |
| P80188 | Neutrophil gelatinase-associated lipocalin           | ITLYGR              |
| P15531 | Nucleoside diphosphate kinase A, B                   | PFFAGLVK            |
| Q16625 | Occludin                                             | SLQSELDEINK         |
| P10451 | Osteopontin                                          | GDSVVYGLR           |
| P78380 | Oxidized low-density lipoprotein receptor 1          | LEGQISAR            |
| Q13219 | Pappalysin-1                                         | AYLDVNELK           |
| Q06830 | Peroxiredoxin-1                                      | ADEGISFR            |
| P32119 | Peroxiredoxin-2                                      | GLFIIDGK            |
| P04180 | Phosphatidylcholine-sterol acyltransferase           | SSGLVSNAPGVQIR      |
| P80108 | Phosphatidylinositol-glycan-specific phospholipase D | FGSSLITVR           |
| P55058 | Phospholipid transfer protein                        | AVEPQLQEEER         |
| P36955 | Pigment epithelium-derived factor                    | LQSLFDSPDFSK        |
| P05155 | Plasma protease C1 inhibitor                         | FQPTLLTLPR          |

|               |                                                      |                      |
|---------------|------------------------------------------------------|----------------------|
| P05154        | Plasma serine protease inhibitor                     | GFQQLLQELNQPR        |
| P05121        | Plasminogen activator inhibitor 1                    | VFQQVAQASK           |
| P00747        | Plasminogen                                          | EAQLPVIENK           |
| P13796        | Plastin-2                                            | ISFDEFIK             |
| P16284        | Platelet endothelial cell adhesion molecule          | SELVTVTESFSTPK       |
| Q9HCN6        | Platelet glycoprotein VI                             | EGDPAPYK             |
| Q13093        | Platelet-activating factor acetylhydrolase           | GSVHQNFADFTFATGK     |
| P20742        | Pregnancy zone protein                               | ISEITNIVSK           |
| P01210        | Proenkephalin-A                                      | ELLETDGDR            |
| P01236        | Prolactin                                            | IDNYLK               |
| P80511        | Protein S100-A12                                     | GHFDTLK              |
| P06702        | Protein S100-A9                                      | DLQNFLK              |
| Q9UK55        | Protein Z-dependent protease inhibitor               | ETSNFGFSLLR          |
| Q99497        | Protein_deglycase_DJ-1                               | ALVILAK              |
| Q92954        | Proteoglycan 4                                       | DQYYNIDVPSR          |
| P00734        | Prothrombin                                          | ELLESYIDGR           |
| P16109        | P-selectin                                           | TWTWVGTK             |
| Q9UJF2        | Ras GTPase-activating protein nGAP                   | ETQSTPQSAPQVR        |
| Q9HD89        | Resistin                                             | IQEVAGSLIFR          |
| P02753        | Retinol-binding protein 4                            | YWGVASFLQK           |
| P02787        | Serotransferrin                                      | DGAGDVAFVK           |
| P02768        | Serum albumin                                        | LVNEVTEFAK           |
| P0DJ18 P0DJ19 | Serum amyloid A-1 and A-2 proteins                   | EANYIGSDK            |
| P02743        | Serum amyloid P-component                            | IVLGQEQDSYGGK        |
| P27169        | Serum paraoxonase/arylesterase 1                     | IFFYDSENPPASEVLR     |
| Q15166        | Serum paraoxonase/lactonase 3                        | ILIGTVFHK            |
| P04278        | Sex hormone-binding globulin                         | TSSSFEVR             |
| P09486        | SPARC                                                | LEAGDHPVELLAR        |
| Q9NWM0        | Spermine oxidase                                     | YYSTTHGALLSGQR       |
| Q8IVG5        | Sterile alpha motif domain-containing protein 9-like | ENVLDEVANAK          |
| P08254        | Stromelysin-1                                        | TYFFVEDK             |
| Q7Z7G0        | Target of Nesh-SH3                                   | IYLSDSLTK            |
| Q9BXI6        | TBC1 domain family member 10A                        | YLPGYSEK             |
| P24821        | Tenascin                                             | FTTDLSPR             |
| P22105 Q16473 | Tenascin-X                                           | ILISGLEPSTPYR        |
| P05452        | Tetranectin                                          | NWETEITAQPDDGGK      |
| P07996        | Thrombospondin-1                                     | GTLLALER             |
| P35443        | Thrombospondin-4                                     | KPQDFLEELK           |
| P01266        | Thyroglobulin                                        | FSPDDSAGASALLR       |
| P05543        | Thyroxine-binding globulin                           | AVLHIGEK             |
| P10646        | Tissue_factor_pathway_inhibitor                      | FYYNSVIGK            |
| P00750        | Tissue-type plasminogen activator                    | VVPGEEEQK            |
| P35716        | Transcription factor SOX-1                           | AAQSGDYGGAGDDYVLGSLR |

|        |                                                      |                 |
|--------|------------------------------------------------------|-----------------|
| P02786 | Transferrin receptor protein 1                       | GFVEPDHYVVVGAQR |
| P02766 | Transthyretin                                        | GSPAINVAVHVFR   |
| P19438 | Tumor necrosis factor receptor superfamily member 1A | LGLSDHEIDR      |
| P20333 | Tumor necrosis factor receptor superfamily member 1B | DEQVPFSK        |
| P19320 | Vascular cell adhesion protein 1                     | NTVISVNPSTK     |
| P49765 | Vascular endothelial growth factor B                 | VVSWIDVYTR      |
| O43915 | Vascular endothelial growth factor D                 | DLIQHPK         |
| Q9NY84 | Vascular non-inflammatory molecule 3                 | TETPVSK         |
| Q6EMK4 | Vasorin                                              | YLQGSSVQLR      |
| P02774 | Vitamin D-binding protein                            | VLEPTLK         |
| P04070 | Vitamin K-dependent protein C                        | LGEYDLR         |
| P07225 | Vitamin K-dependent protein S                        | VYFAGFPR        |
| P22891 | Vitamin K-dependent protein Z                        | DFAEHLIPR       |
| P04004 | Vitronectin                                          | FEDGVLDPDYPR    |
| P04275 | von Willebrand factor                                | ILAGPAGDSNVVK   |
| P12955 | Xaa-Pro dipeptidase                                  | AVYEAVLR        |
| P25311 | Zinc-alpha-2-glycoprotein                            | EIPAWVPDPAAQITK |



Supplementary Table 2. Lots of commercial human plasma analyzed.

| <b>Lot#</b> | <b>Gender</b>       | <b>Age</b> | <b>Race</b> |
|-------------|---------------------|------------|-------------|
| BRH1447333  | Male                | 22         | Black       |
| BRH1447334  | Male                | 34         | Hispanic    |
| BRH1447335  | Male                | 29         | Hispanic    |
| BRH1447336  | Male                | 32         | Black       |
| BRH1447337  | Male                | 35         | Caucasian   |
| BRH1447338  | Male                | 41         | Hispanic    |
| BRH1447339  | Male                | 28         | Hispanic    |
| BRH1447340  | Male                | 40         | Black       |
| BRH1447341  | Male                | 56         | Black       |
| BRH1447342  | Male                | 38         | Hispanic    |
| BRH1447343  | Female              | 23         | Black       |
| BRH1447344  | Female              | 67         | Hispanic    |
| BRH1447345  | Female              | 56         | Hispanic    |
| BRH1447346  | Female              | 55         | Black       |
| BRH1447347  | Female              | 21         | Hispanic    |
| BRH1447348  | Female              | 37         | Hispanic    |
| BRH1447349  | Female              | 27         | Black       |
| BRH1447350  | Female              | 57         | Hispanic    |
| BRH1447351  | Female              | 51         | Hispanic    |
| BRH1447352  | Female              | 45         | Hispanic    |
| BRH1447353  | Pooled human plasma |            |             |

Supplementary Table 3. Concentration fold-differences as well as minimum and maximum concentrations for proteins quantified in at least five plasma samples across all three days.

| UniProt ID | Protein                                      | Protein concentration (fmol/ $\mu$ L) |           | Concentration fold-difference |
|------------|----------------------------------------------|---------------------------------------|-----------|-------------------------------|
|            |                                              | Minimum                               | Maximum   |                               |
| P16035     | Metalloproteinase inhibitor 2                | 5.57                                  | 6.27      | 1.12                          |
| P02768     | Serum albumin                                | 546103.33                             | 747923.33 | 1.37                          |
| Q01459     | Di-N-acetylchitobiase                        | 22.36                                 | 30.78     | 1.38                          |
| P01008     | Antithrombin-III                             | 18986.00                              | 26703.33  | 1.41                          |
| P01011     | Alpha-1-antichymotrypsin                     | 2041.13                               | 2945.03   | 1.44                          |
| P00734     | Prothrombin                                  | 2485.17                               | 3631.30   | 1.46                          |
| P08697     | Alpha-2-antiplasmin                          | 612.26                                | 898.36    | 1.47                          |
| P15169     | Carboxypeptidase N catalytic chain           | 97.40                                 | 147.05    | 1.51                          |
| Q6EMK4     | Vasorin                                      | 10.92                                 | 16.57     | 1.52                          |
| Q15166     | Serum paraoxonase/lactonase 3                | 9.34                                  | 14.28     | 1.53                          |
| O60462     | Neuropilin-2                                 | 35.67                                 | 54.59     | 1.53                          |
| Q13224     | Glutamate receptor ionotropic NMDA 2B        | 10.11                                 | 15.70     | 1.55                          |
| O75882     | Attractin                                    | 98.19                                 | 154.07    | 1.57                          |
| P51884     | Lumican                                      | 218.63                                | 349.83    | 1.60                          |
| P01042     | Kininogen-1                                  | 1417.83                               | 2285.20   | 1.61                          |
| P22792     | Carboxypeptidase N subunit 2                 | 33.43                                 | 53.90     | 1.61                          |
| P02787     | Serotransferrin                              | 13301.33                              | 22229.33  | 1.67                          |
| P01034     | Cystatin-C                                   | 25.96                                 | 43.44     | 1.67                          |
| P02747     | Complement C1q subcomponent subunit C        | 458.97                                | 768.75    | 1.67                          |
| P48740     | Mannan-binding lectin serine protease 1      | 66.84                                 | 112.88    | 1.69                          |
| P80188     | Neutrophil gelatinase-associated lipocalin   | 1.87                                  | 3.18      | 1.70                          |
| Q9NZP8     | Complement C1r subcomponent-like protein     | 40.87                                 | 69.55     | 1.70                          |
| P19823     | Inter-alpha-trypsin inhibitor heavy chain H2 | 872.26                                | 1513.87   | 1.74                          |
| P01031     | Complement C5                                | 127.66                                | 221.58    | 1.74                          |
| P02765     | Alpha-2-HS-glycoprotein                      | 3025.07                               | 5303.63   | 1.75                          |

|        |                                                          |          |          |      |
|--------|----------------------------------------------------------|----------|----------|------|
| Q9Y6R7 | IgGfc-binding protein                                    | 9.94     | 17.48    | 1.76 |
| P00747 | Plasminogen                                              | 385.40   | 680.17   | 1.76 |
| P12955 | Xaa-Pro dipeptidase                                      | 6.13     | 10.85    | 1.77 |
| P07225 | Vitamin K-dependent protein S                            | 198.33   | 353.98   | 1.78 |
| P02745 | Complement C1q subcomponent subunit A                    | 93.60    | 170.18   | 1.82 |
| P33151 | Cadherin-5                                               | 21.85    | 39.90    | 1.83 |
| P36955 | Pigment epithelium-derived factor                        | 160.49   | 296.81   | 1.85 |
| P01024 | Complement C3                                            | 2630.20  | 4899.20  | 1.86 |
| P04180 | Phosphatidylcholine-sterol acyltransferase               | 74.00    | 137.90   | 1.86 |
| P55058 | Phospholipid transfer protein                            | 22.27    | 41.57    | 1.87 |
| P22352 | Glutathione peroxidase 3                                 | 82.77    | 154.83   | 1.87 |
| P18065 | Insulin-like growth factor-binding protein 2             | 5.87     | 11.08    | 1.89 |
| P02774 | Vitamin D-binding protein                                | 2695.93  | 5102.97  | 1.89 |
| P05452 | Tetranectin                                              | 30.59    | 58.26    | 1.90 |
| Q14520 | Hyaluronan-binding protein 2                             | 109.53   | 210.37   | 1.92 |
| P06396 | Gelsolin                                                 | 5920.60  | 11446.00 | 1.93 |
| P00751 | Complement factor B                                      | 739.67   | 1458.47  | 1.97 |
| B7Z2X4 | cDNA FLJ53327, highly similar to Gelsolin (NOT REVIEWED) | 511.01   | 1012.70  | 1.98 |
| P05156 | Complement factor I                                      | 227.50   | 456.56   | 2.01 |
| P05546 | Heparin cofactor 2                                       | 584.53   | 1174.13  | 2.01 |
| P02746 | Complement C1q subcomponent subunit B                    | 154.60   | 311.77   | 2.02 |
| P10643 | Complement component C7                                  | 116.04   | 234.82   | 2.02 |
| Q9UGM5 | Fetuin-B                                                 | 62.38    | 126.36   | 2.03 |
| Q16610 | Extracellular matrix protein 1                           | 40.20    | 81.52    | 2.03 |
| P05160 | Coagulation factor XIII B chain                          | 8.97     | 18.22    | 2.03 |
| P06681 | Complement C2                                            | 67.10    | 137.14   | 2.04 |
| P04003 | C4b-binding protein alpha chain                          | 1255.20  | 2566.73  | 2.04 |
| P01009 | Alpha-1-antitrypsin                                      | 13141.33 | 27533.00 | 2.10 |
| P14151 | L-selectin                                               | 38.28    | 80.85    | 2.11 |

|        |                                                                        |          |          |      |
|--------|------------------------------------------------------------------------|----------|----------|------|
| O95445 | Apolipoprotein M                                                       | 229.31   | 487.49   | 2.13 |
| Q14624 | Inter-alpha-trypsin inhibitor heavy chain H4                           | 1688.87  | 3630.73  | 2.15 |
| Q8IZF2 | Adhesion G protein-coupled receptor F5                                 | 1.56     | 3.37     | 2.15 |
| P06276 | Cholinesterase                                                         | 33.39    | 71.97    | 2.16 |
| P02749 | Beta-2-glycoprotein 1                                                  | 1725.07  | 3720.07  | 2.16 |
| P16284 | Platelet endothelial cell adhesion molecule                            | 3.82     | 8.28     | 2.17 |
| P04070 | Vitamin K-dependent protein C                                          | 31.08    | 67.66    | 2.18 |
| P02790 | Hemopexin                                                              | 4857.30  | 10627.00 | 2.19 |
| P29622 | Kallistatin                                                            | 67.93    | 148.66   | 2.19 |
| P61626 | Lysozyme C                                                             | 50.11    | 110.07   | 2.20 |
| P00736 | Complement C1r subcomponent                                            | 187.46   | 412.08   | 2.20 |
| P23142 | Fibulin-1                                                              | 84.94    | 190.13   | 2.24 |
| P11717 | Cation-independent mannose-6-phosphate receptor                        | 2.55     | 5.74     | 2.25 |
| Q96PD5 | N-acetylmuramoyl-L-alanine amidase                                     | 183.68   | 413.88   | 2.25 |
| P07357 | Complement component C8 alpha chain                                    | 115.61   | 261.01   | 2.26 |
| P17936 | Insulin-like growth factor-binding protein 3                           | 16.39    | 37.42    | 2.28 |
| P00488 | Coagulation factor XIII A chain                                        | 50.40    | 115.32   | 2.29 |
| P04196 | Histidine-rich glycoprotein                                            | 433.70   | 999.12   | 2.30 |
| Q8WXI7 | Mucin-16                                                               | 29.98    | 69.29    | 2.31 |
| P09871 | Complement C1s subcomponent                                            | 188.42   | 441.19   | 2.34 |
| P43251 | Biotinidase                                                            | 58.67    | 137.41   | 2.34 |
| P02675 | Fibrinogen beta chain                                                  | 16224.00 | 38208.00 | 2.36 |
| P00742 | Coagulation factor X                                                   | 78.08    | 184.45   | 2.36 |
| P61769 | Beta-2-microglobulin                                                   | 46.94    | 111.32   | 2.37 |
| P35858 | Insulin-like growth factor-binding protein complex acid labile subunit | 74.97    | 178.61   | 2.38 |
| P02652 | Apolipoprotein A-II                                                    | 5756.47  | 13715.00 | 2.38 |
| P08185 | Corticosteroid-binding globulin                                        | 464.49   | 1109.56  | 2.39 |
| Q96IY4 | Carboxypeptidase B2                                                    | 50.82    | 121.46   | 2.39 |

|               |                                              |          |          |      |
|---------------|----------------------------------------------|----------|----------|------|
| P02679        | Fibrinogen gamma chain                       | 8016.13  | 19232.00 | 2.40 |
| P05543        | Thyroxine-binding globulin                   | 141.15   | 342.22   | 2.42 |
| P02671        | Fibrinogen alpha chain                       | 9679.80  | 24136.67 | 2.49 |
| Q13790        | Apolipoprotein F                             | 152.11   | 381.13   | 2.51 |
| P00450        | Ceruloplasmin                                | 930.59   | 2435.53  | 2.62 |
| P16109        | P-selectin                                   | 1.17     | 3.06     | 2.62 |
| P25311        | Zinc-alpha-2-glycoprotein                    | 176.63   | 465.02   | 2.63 |
| P07358        | Complement component C8 beta chain           | 53.40    | 140.88   | 2.64 |
| P02753        | Retinol-binding protein 4                    | 489.18   | 1294.70  | 2.65 |
| P02751        | Fibronectin                                  | 553.66   | 1485.53  | 2.68 |
| P02647        | Apolipoprotein A-I                           | 15888.33 | 42915.00 | 2.70 |
| P27169        | Serum paraoxonase/arylesterase 1             | 437.16   | 1191.07  | 2.72 |
| P04217        | Alpha-1B-glycoprotein_VAR_018369             | 796.42   | 2206.73  | 2.77 |
| P02763        | Alpha-1-acid glycoprotein 1                  | 2840.90  | 8040.23  | 2.83 |
| P05155        | Plasma protease C1 inhibitor                 | 938.98   | 2714.43  | 2.89 |
| P08709        | Coagulation factor VII                       | 4.13     | 11.95    | 2.89 |
| Q9NQ79        | Cartilage acidic protein 1                   | 8.64     | 25.16    | 2.91 |
| Q9HDC9        | Adipocyte plasma membrane-associated protein | 6.65     | 19.50    | 2.93 |
| P02743        | Serum amyloid P-component                    | 275.72   | 813.46   | 2.95 |
| P10909        | Clusterin                                    | 657.33   | 1940.93  | 2.95 |
| P02766        | Transthyretin                                | 180.18   | 542.95   | 3.01 |
| POCOL4 POCOL5 | Complement_C4                                | 892.00   | 2698.93  | 3.03 |
| P13671        | Complement component C6                      | 68.69    | 217.31   | 3.16 |
| P06312        | Immunoglobulin kappa variable 4-1            | 587.16   | 1903.23  | 3.24 |
| O14791        | Apolipoprotein L1                            | 321.77   | 1063.18  | 3.30 |
| P43652        | Afamin                                       | 132.87   | 445.56   | 3.35 |
| P02748        | Complement component C9                      | 205.47   | 689.82   | 3.36 |
| P05090        | Apolipoprotein D                             | 961.15   | 3256.33  | 3.39 |
| P80108        | Phosphatidylinositol-glycan-specific         | 24.09    | 82.23    | 3.41 |

|               |                                                     |          |          |      |
|---------------|-----------------------------------------------------|----------|----------|------|
|               | phospholipase D                                     |          |          |      |
| P01023        | Alpha-2-macroglobulin                               | 3561.20  | 12311.00 | 3.46 |
| P04114        | Apolipoprotein B-100                                | 87.29    | 306.37   | 3.51 |
| P02750        | Leucine-rich alpha-2-glycoprotein                   | 156.05   | 574.48   | 3.68 |
| P02649        | Apolipoprotein E                                    | 279.70   | 1041.62  | 3.72 |
| Q15848        | Adiponectin                                         | 44.29    | 166.33   | 3.76 |
| P35542        | Serum amyloid A-4 protein                           | 586.70   | 2210.47  | 3.77 |
| P04004        | Vitronectin                                         | 809.57   | 3102.60  | 3.83 |
| P80511        | Protein S100-A12                                    | 5.41     | 20.95    | 3.87 |
| P00915        | Carbonic anhydrase 1                                | 6.62     | 26.21    | 3.96 |
| Q96KN2        | Beta-Ala-His dipeptidase                            | 24.90    | 99.28    | 3.99 |
| P00738        | Haptoglobin                                         | 12095.67 | 54168.67 | 4.48 |
| O43866        | CD5 antigen-like                                    | 15.96    | 71.48    | 4.48 |
| P02654        | Apolipoprotein C-I                                  | 868.04   | 3926.23  | 4.52 |
| P01019        | Angiotensinogen                                     | 341.49   | 1581.00  | 4.63 |
| P02656        | Apolipoprotein C-III                                | 1457.20  | 6837.50  | 4.69 |
| Q92954        | Proteoglycan 4                                      | 14.69    | 77.95    | 5.31 |
| P00748        | Coagulation factor XII                              | 111.99   | 602.56   | 5.38 |
| P07996        | Thrombospondin-1                                    | 5.69     | 32.49    | 5.71 |
| P02655        | Apolipoprotein C-II                                 | 304.56   | 1861.87  | 6.11 |
| P06727        | Apolipoprotein A-IV                                 | 486.31   | 2982.47  | 6.13 |
| P04220 P01871 | Ig mu heavy chain disease protein and Ig mu chain C | 2473.70  | 15590.00 | 6.30 |
| P06702        | Protein S100-A9                                     | 31.69    | 200.76   | 6.34 |
| P01871        | Ig mu chain C region                                | 1648.33  | 10950.00 | 6.64 |
| P04278        | Sex hormone-binding globulin                        | 23.93    | 180.31   | 7.53 |
| P55056        | Apolipoprotein C-IV                                 | 14.47    | 111.19   | 7.68 |
| P05154        | Plasma serine protease inhibitor                    | 15.23    | 119.76   | 7.86 |
| P51911        | Calponin-1                                          | 85.84    | 792.34   | 9.23 |
| P01857        | Ig gamma-1 chain C region                           | 1939.97  | 18523.33 | 9.55 |

|               |                                    |       |         |       |
|---------------|------------------------------------|-------|---------|-------|
| P69905        | Hemoglobin subunit alpha           | 29.89 | 364.28  | 12.19 |
| P08519        | Apolipoprotein(a)                  | 72.54 | 1096.50 | 15.11 |
| P20742        | Pregnancy zone protein             | 11.38 | 371.27  | 32.61 |
| P02741        | C-reactive protein                 | 6.56  | 392.14  | 59.80 |
| PODJI8 PODJI9 | Serum amyloid A-1 and A-2 proteins | 12.93 | 898.01  | 69.46 |

## Supplementary Figures



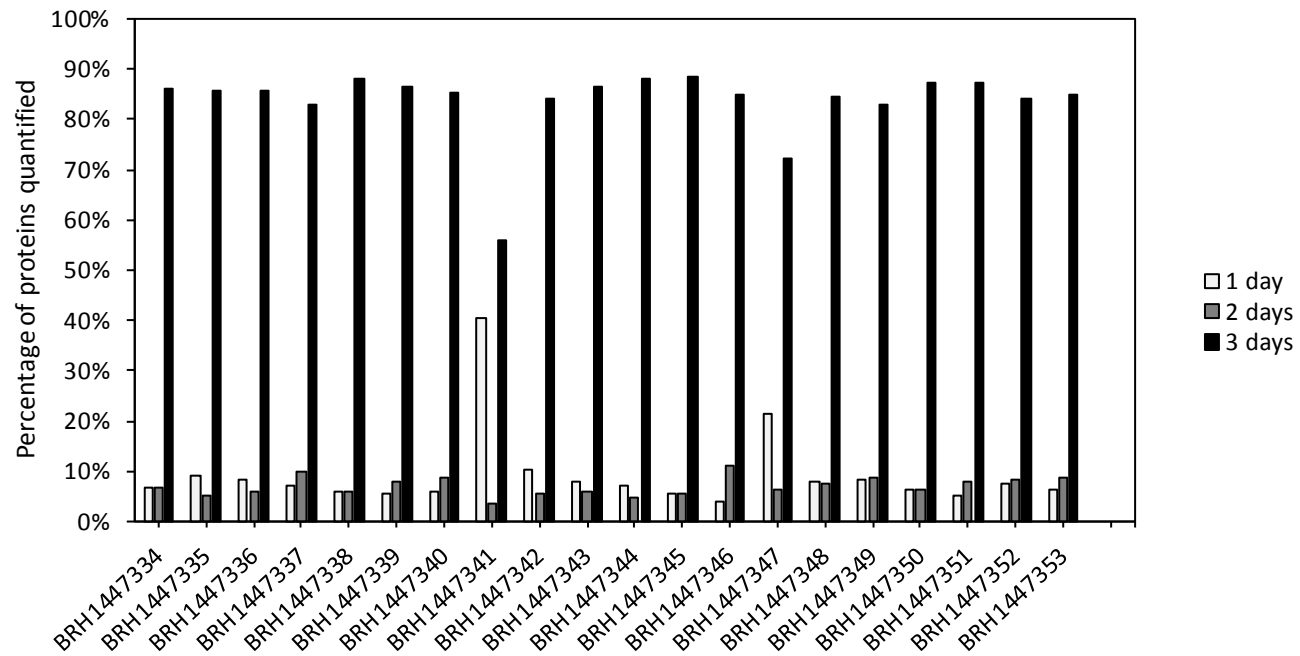

Supplementary Figure 1. Overlap of proteins quantified across one, two, or three days in 21 plasma samples.

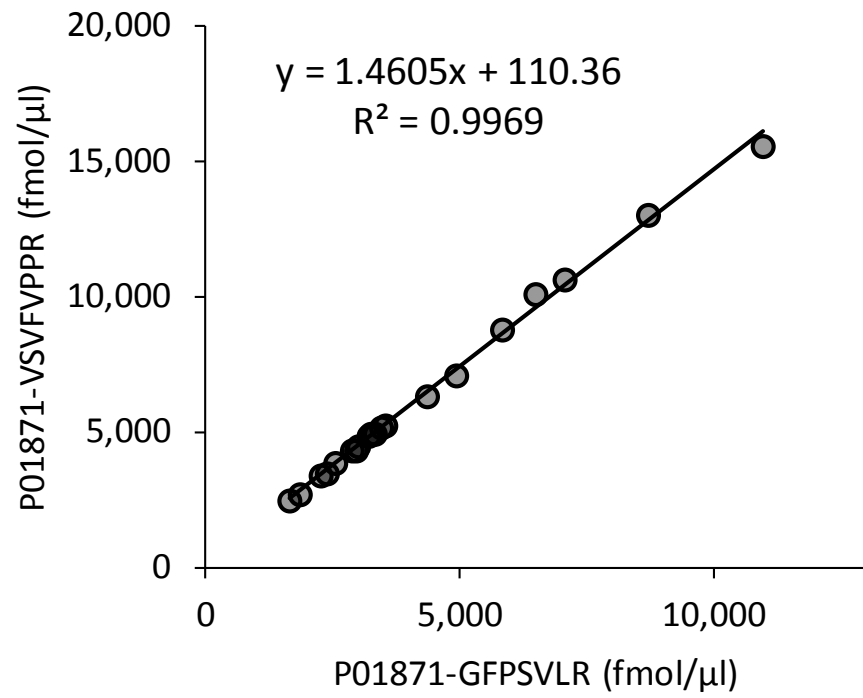

Supplementary Figure 2. Correlation of concentrations determined for protein P01871 with peptides VSVFVPPR and GFPSVLR.
