# Supplementary material for: Determination of the concentration range for 267 proteins from 21 lots of commercial human plasma using highly multiplexed multiple reaction monitoring mass spectrometry
Source: Royal Society of Chemistry journal article supplement (doi:10.1039/c9an01893j), 2020-01-01
Supplement: c9an01893j2.csv [file c9an01893j2.csv]

Q8IZF2	P08709	P16035	P12955	Q9HDC9	Q9Y6R7	Q6EMK4	Q9NQ79	P0DJI8	P22105	P17936	P02741	P20742	O43866	Q92954	P55058	P01034	P04278	O60462	P69905	P80108	P04070	P22792	Q8WXI7	P06276	Q9NZP8	P05452	P55056	P07358	Q16610	Q96KN2	P14151	Q96IY4	P61626	P61769	P06681	P43251	P00488	P35858	P04180	P02745	P05154	Q15848	P00742	O75882	P07357	P13671	P15169	P01031	P22352
1.8	5.2	6.3	6.6	7.8	10	11.4	12.4	12.9	17	23.2	23.3	24.5	27.7	27.9	29.5	30.7	32.3	37.3	38.9	39.4	41.1	41.8	42.3	43.1	45.4	46.3	51.7	53.4	57.9	58.8	59.1	63.7	69.2	70.5	72.6	73.9	79.2	90.3	91	94.9	97.7	100.9	102.5	105	115.6	117.5	125.3	127.7	128
2.6	6.4	5.8	9	14.4	NA	15.1	22.7	47.6	14.1	29.1	33.2	12	26	50.3	38.4	33.5	35.7	49.1	284.2	47.3	50.3	51.9	49	47	61	58.3	51.3	98.2	81.5	88.9	58	95.6	106.8	86	108.7	106.4	115.3	134.4	105	118.3	103.1	104.6	184.4	126.8	189.8	108.2	125.6	205.8	154.8
2	7.3	NA	6.1	10.1	NA	13.7	15.2	28.7	NA	29.3	23.1	NA	28.9	30	29.3	30.7	28.8	44.8	155	62	47.3	37.6	41.8	49	49.5	44.2	56.2	108.4	40.2	59.2	65.1	83.1	105	77.1	96.1	NA	98.1	122	97.2	93.6	99.2	68.1	129.8	108.6	185.8	151.9	97.4	161.2	106.9
2.1	6.4	6.2	NA	15.5	10.4	11.1	13.2	32	NA	26.3	17.4	66.6	20.9	21.5	41.6	34.9	48.5	41.9	51.2	45.7	32.7	35.5	56.7	41.1	43.1	39.2	NA	86.7	55.8	29.6	51.4	67.5	99.5	66	69.2	68	73.7	103	87.3	120.3	65.7	72.4	96.9	100.9	143.8	68.7	106.8	145.5	99.3
1.9	5.9	6.1	NA	NA	NA	16.6	13	264.5	NA	20.7	90.7	11.4	20.7	29.8	34.9	43.4	34.7	48.2	75.3	59.7	33.5	40.7	51.4	42.4	50.5	43.4	26.1	101.1	58	33.6	38.3	54.2	83	91.8	75.4	85.5	105	95.8	79.2	110.7	108.6	76.4	108.4	113.5	181.6	136.9	103.5	147.3	94
1.8	6.2	NA	7	NA	11.3	13.3	16.4	20.8	NA	33.4	6.6	NA	22.5	29.4	41.5	38	45.3	46	187.4	82.2	45.3	49.8	49.5	61.4	48.4	49.4	44.5	70.4	46.2	47.4	47.8	50.8	102.2	97.7	80.6	111.1	93.4	126.7	96.7	113.9	110.7	101.1	126.8	146.3	142.5	131.9	105.8	172.5	121.6
2.5	9	NA	8.2	NA	NA	13.2	11.5	NA	NA	35.4	8.6	38.5	21	32.4	35.9	32.7	31	46.5	358	59.2	45.8	33.4	33.8	53.1	47.1	41.1	45.3	94	53.8	63.5	54.1	74.6	99.9	89.8	79.5	107.3	75.3	128	101.7	129.8	98.4	67.8	149.7	130.2	181	137.7	98.1	128.9	83.7
2.2	6.6	NA	NA	12.3	12.1	12.6	19.7	13.2	NA	18.8	NA	NA	36.9	14.7	36.5	32.6	53.3	41	29.9	53.7	31.1	36.3	63.3	41	40.9	58	26.8	79.1	67.5	27.2	59.9	59.2	98.7	70.4	67.1	94.3	96.8	77.2	74	119	81.7	77.1	78.1	122.9	137.4	110.8	100.4	128.5	119.2
3.4	8.7	NA	10.8	15	11.3	15.5	20.9	280.8	NA	32	163.6	59.6	16	77.9	39.7	40.3	59.1	48.6	60.7	24.1	67.7	53.9	63.6	56.9	64.1	44.2	28.3	140.9	63.9	99.3	48.5	121.5	87.1	111.3	133.3	103.8	68.3	132.2	137.9	170.2	22.5	44.3	172.3	108.2	261	192.7	119.3	221.6	136.5
2.3	9.8	NA	6.6	13.2	17.5	12	15.7	21.1	NA	22.2	33.2	NA	33.4	60	29.8	32.9	23.9	41.8	364.3	52.4	44.1	40.5	51.2	66.5	53.1	44.2	111.2	107.5	50.9	73.1	57.6	69.9	71.5	82	88.3	122.7	74.4	112.9	111.7	115.4	117.5	52.8	116.5	133	200.2	143.6	104.7	199.4	96.4
NA	9.1	5.6	6.7	NA	13.1	11	14.3	18.4	NA	16.4	56.2	61.6	71.5	16.4	22.3	27.1	74.6	42.4	38.9	32.6	32.2	35.4	69.3	34.5	47	46	18.4	79.8	61.9	24.9	57.5	59.4	50.1	77.1	86.8	58.7	50.4	75	80.8	113.9	74.1	83.9	82.1	99.3	147.4	168.8	107.1	143.3	108.3
2.2	7.7	NA	7.2	15.5	13.8	14.9	22	39.1	NA	26.9	66.5	124.6	36.9	45.2	38	38.3	73.4	54.6	88.4	48.8	41.8	41.4	39	53.6	47.7	36.1	58.5	95.9	75.1	49.3	53.7	60.2	90.2	104.3	88	92.4	93	113	96.2	136.5	112.4	95.3	115	134.1	165.9	138.2	126.5	151	92.5
2.9	4.1	5.8	6.6	18.7	13.6	12.7	17.6	56.5	NA	23	103	371.3	58.3	52.6	30.1	39.1	51.3	50.3	149.8	49.8	37.1	42.9	31.1	72	64.6	42.9	42.1	101.3	79.8	70.9	80.9	68.7	109.4	96	87.2	119.6	74.5	102.3	128.7	131.9	89.5	62.7	124.9	154.1	179.1	189.9	122.9	177.8	82.8
NA	6.6	NA	NA	8.1	NA	10.9	21.1	60.3	NA	28.8	56.8	198.5	32.2	15.4	27.9	32.1	48.3	45.2	92.7	41.4	45.8	43.8	NA	49.9	44.4	30.6	15.4	88.8	52.1	47.2	50.7	82.4	87.1	72.8	137.1	91	62.2	119.9	105.1	135	75.5	83.2	114.7	119.8	134.9	124.3	122.7	151.7	94.8
1.6	11.4	NA	7	12.8	10.7	NA	8.6	25.8	NA	33.6	20.1	64.7	28.7	20.9	23	33.3	97.1	36	87	78.2	43.1	50.4	57	43.8	61.4	38.9	43	93.3	53.1	55.3	68.1	85.9	59.2	69.7	82.8	96.4	66	178.6	91.8	132.4	15.2	69.4	149.3	105.6	170.8	104.4	147.1	153	97.4
2.2	8.7	NA	NA	18	12.4	12	25.2	94.3	NA	31.3	207.7	245.6	67	38.9	28.8	33.9	35.4	43.1	173.1	47.7	36.9	41.7	40.8	42.2	69.6	42	74.9	105	66.6	56.7	63.5	83.2	110.1	59.2	83.2	81	61.5	135	104.4	153.6	83.3	46.6	132.2	106.9	195.6	146.3	105.2	181.5	96
1.7	6.5	NA	NA	9.4	10.1	12.2	17.2	23.5	NA	32.9	NA	NA	26.1	27.3	33.7	26	96.8	35.7	36.2	56.3	47.6	42.5	33.5	45.3	46.9	49.1	14.5	83.8	67.2	26	41	61.1	56.9	46.9	87.4	68.8	105.2	134.9	108	117.5	88.8	90.1	120.3	98.2	145.8	150.4	122.9	182.1	122.4
2.8	11.9	NA	8.2	19.5	NA	13.4	15.8	898	NA	29.6	392.1	257.4	51.8	52.2	36.9	26.8	42.6	45.6	59.7	46.9	37.5	42.2	30	56.1	63.5	45.2	34.6	139	81	61.3	49.5	67.9	82.3	87.3	94.3	137.4	81.7	119.7	121.2	106	97.4	166.3	130	127.7	254.3	217.3	118.1	182.1	131.7
1.8	7.1	NA	7.5	6.6	9.9	12.2	21.1	70.5	NA	37.4	9.2	52.1	58	33.5	39.3	31.7	50.2	46.2	91.8	46	47.1	48.4	34.3	42.2	55.3	41.6	21.9	100.2	64.4	34.6	55.3	61.4	73.8	107.9	93.3	123.3	85.4	162.3	107.7	137.3	119.8	113.3	103.8	137.9	198.4	191.7	146.6	145.7	106.7
1.8	5.3	NA	NA	10.6	NA	11.2	23.1	64.2	NA	22.9	35.8	95.4	33.5	29.1	37.8	27.4	180.3	39.6	88.7	39.9	45.1	33.6	47.9	33.4	49.7	44.2	NA	98.7	63.7	44.3	59.9	71.3	68.6	88.3	95.8	72.1	78.4	107.1	84.2	111	85	97.7	98.1	102.2	192.5	171.5	99.8	162.7	116.7
[truncated: 93 more columns]
